# Supplementary material
Source: publisher figshare collection journal article supplement (https://gsapubs.figshare.com/articles/dataset/_/23200232)
Supplement: Supplementary file 1 [file 1]

## Sheet: Mineral compositions
	LHR2 Garnet without inclusions- mafic domain
	Analysis	152	153	154	155	156	157	158	159	160	161	162	163	164	165	166	167	168	169	170	171	172	173	174	175	176	177	178	179	180	181	182	183	184	185	186	187	188	189	190	191	192	193	194	195	196	197	198	199
	Comment	Line 1 LHR2-C1-L3	Line 2 LHR2-C1-L3	Line 3 LHR2-C1-L3	Line 4 LHR2-C1-L3	Line 5 LHR2-C1-L3	Line 6 LHR2-C1-L3	Line 7 LHR2-C1-L3	Line 8 LHR2-C1-L3	Line 9 LHR2-C1-L3	Line 10 LHR2-C1-L3	Line 11 LHR2-C1-L3	Line 12 LHR2-C1-L3	Line 13 LHR2-C1-L3	Line 14 LHR2-C1-L3	Line 15 LHR2-C1-L3	Line 16 LHR2-C1-L3	Line 17 LHR2-C1-L3	Line 18 LHR2-C1-L3	Line 19 LHR2-C1-L3	Line 20 LHR2-C1-L3	Line 21 LHR2-C1-L3	Line 22 LHR2-C1-L3	Line 23 LHR2-C1-L3	Line 24 LHR2-C1-L3	Line 25 LHR2-C1-L3	Line 26 LHR2-C1-L3	Line 27 LHR2-C1-L3	Line 28 LHR2-C1-L3	Line 29 LHR2-C1-L3	Line 30 LHR2-C1-L3	Line 31 LHR2-C1-L3	Line 32 LHR2-C1-L3	Line 33 LHR2-C1-L3	Line 34 LHR2-C1-L3	Line 35 LHR2-C1-L3	Line 36 LHR2-C1-L3	Line 37 LHR2-C1-L3	Line 38 LHR2-C1-L3	Line 39 LHR2-C1-L3	Line 40 LHR2-C1-L3	Line 41 LHR2-C1-L3	Line 42 LHR2-C1-L3	Line 43 LHR2-C1-L3	Line 44 LHR2-C1-L3	Line 45 LHR2-C1-L3	Line 46 LHR2-C1-L3	Line 47 LHR2-C1-L3	Line 48 LHR2-C1-L3
[wt.%]	SiO2	39.94	40.31	40.08	40.44	40.14	40.29	40.84	40.11	40.69	40.91	40.74	41.09	41.06	41.26	40.84	40.91	41.01	41.23	41.11	41.21	41.28	40.98	41.08	41.31	41.12	41.18	41.34	41.17	40.95	40.75	40.98	41.11	40.9	40.89	41.13	41.33	40.77	40.89	40.87	40.87	40.65	40.61	40.81	40.75	40.82	40.83	40.87	40.57
	TiO2	0	0.0234	0.0399	0.0248	0	0	0.0332	0.0442	0.0014	0	0.0235	0.0638	0.0125	0	0.0431	0.0264	0.0167	0.064	0.0667	0.0542	0.0112	0.0139	0.0639	0.0069	0.0515	0	0.0765	0.0097	0	0.0708	0.0264	0.0666	0	0.0305	0	0.0513	0	0	0.018	0.0373	0.0125	0.0153	0	0.0055	0.0498	0.065	0.065	0
	Al2O3	23.49	23.45	23.59	23.33	23.54	23.78	23.84	23.36	23.96	23.49	23.4	23.35	23.42	23.51	23.57	23.64	23.85	23.86	23.76	23.86	23.94	23.8	23.88	23.65	23.85	23.57	23.69	23.68	23.61	23.74	23.57	23.63	23.72	23.49	23.61	23.63	23.49	23.46	23.48	23.13	23.5	23.57	23.47	23.47	23.41	23.2	23.59	23.34
	FeO	24.99	24.66	24.74	24.79	24.26	23.64	22.95	23.48	23.25	22.41	22.42	22.33	21.59	21.23	21.19	21.32	21.48	20.76	20.72	20.68	20.56	20.77	20.92	20.92	20.83	20.85	20.78	21.03	21.11	21.47	21.58	21.54	21.9	21.83	21.91	22.21	22.43	22.36	22.5	22.93	23.12	22.93	23.03	22.86	23.45	23.3	23.65	23.6
	MnO	0.3163	0.4179	0.3735	0.356	0.3788	0.2184	0.2722	0.2551	0.2574	0.2047	0.2202	0.1851	0.1717	0.1499	0.1711	0.1202	0.1216	0.1528	0.1464	0.1295	0.1203	0.1782	0.1357	0.1668	0.0954	0.1711	0.1584	0.1675	0.2218	0.1695	0.214	0.2161	0.2075	0.2147	0.2217	0.2266	0.3112	0.2075	0.2759	0.2426	0.275	0.2779	0.2673	0.2469	0.3595	0.3461	0.396	0.3277
	MgO	12.54	13.03	12.74	12.83	12.92	13.38	13.59	13.28	13.84	14.21	14.4	14.67	14.68	14.86	14.95	15.1	15.44	15.51	15.6	15.33	15.59	15.57	15.5	15.28	14.92	15.27	15.28	14.88	14.96	14.92	14.78	14.61	14.6	14.66	14.4	14.23	14.4	14.26	13.99	13.98	14.29	13.94	13.71	13.79	13.49	13.49	13.3	13.49
	CaO	1.51	1.3968	1.4	1.4	1.53	1.2706	1.51	1.3325	1.3568	1.44	1.51	1.53	1.57	1.63	1.57	1.52	1.4	1.2825	1.2742	1.42	1.44	1.53	1.57	1.65	1.68	1.7	1.69	1.73	1.71	1.74	1.71	1.68	1.65	1.76	1.75	1.75	1.61	1.67	1.62	1.64	1.54	1.64	1.65	1.61	1.66	1.67	1.65	1.66
	Na2O	0	0.0339	0	0	0.0431	0	0	0	0.0304	0	0.0041	0.013	0	0.007	0.0204	0.0052	0	0.0108	0	0.0309	0	0	0.0035	0	0.047	0.018	0.0348	0.018	0	0.0167	0.0049	0.0243	0.0182	0.0176	0	0.0151	0.0242	0.0071	0	0	0.0149	0	0	0	0	0	0	0.0046
	K2O	0	0.0018	0	0	0	0.0213	0	0.0039	0.0125	0	0.0008	0	0.0025	0.0058	0.0041	0	0.0038	0	0	0.001	0	0.0008	0	0	0	0.0105	0	0.0016	0.0023	0.0005	0	0.0011	0	0.0089	0.0008	0.011	0	0.0085	0	0.0033	0.0023	0	0	0.0049	0	0	0.0028	0.0118
	P2O5	0.0217		0.0204		0.025	0.0068	0.0414	0.0053		0.0564	0.0434		0.0224	0.0243	0.0128	0.0112		0.0432	0.0387	0.0366	0.0591	0.0321	0.0405	0.0316	0.0272		0.062	0.0087	0.0116	0.045	0.0301	0.0396	0.031	0.0386				0.0616	0.0517	0.0298	0.0393	0.0196	0.0302	0.0294		0.0098	0.0312
	Cl	0.003	0.0097	0	0.0164	0.0055	0	0	0	0.0012	0	0	0	0.0012	0.0006	0.0061	0	0.003	0.0061	0	0.0018	0	0	0	0	0	0	0.0025	0	0.0122	0	0	0.0043	0.0061	0.0055	0	0	0.0122	0.0213	0	0	0.0091	0	0.0079	0.0079	0.0194	0	0.0012	0.0018
	Cr2O3	0.0291	0.0179	0	0.0467	0	0	0.0435	0.0539	0.0793	0.0038	0.0546	0	0.0154	0.0245	0	0.0143	0	0.0122	0	0.0032	0	0	0.0215	0.0893	0	0	0.0413	0.0358	0.0244	0.0273	0.0232	0.017	0.0224	0.0175	0.015	0.0126	0.0255	0.0058	0.0117	0.0077	0.1107	0	0.0295	0.0606	0	0.0178	0.0029	0
	Total	102.84	103.351	102.984	103.234	102.842	102.607	103.12	101.925	103.479	102.725	102.817	103.232	102.546	102.702	102.377	102.667	103.325	102.931	102.716	102.757	103.001	102.875	103.215	103.105	102.621	102.769	103.155	102.731	102.612	102.95	102.918	102.939	103.055	102.963	103.037	103.467	103.073	102.952	102.817	102.871	103.564	103.003	103.005	102.835	103.259	102.929	103.559	103.006
[a.p.f.u]	Si	5.88502	5.89884	5.88626	5.92467	5.89571	5.90049	5.93417	5.91824	5.90126	5.95112	5.92941	5.94462	5.96133	5.97038	5.93159	5.92475	5.90113	5.93522	5.92955	5.94169	5.93333	5.90976	5.90839	5.95033	5.94435	5.94688	5.94915	5.95306	5.93439	5.89951	5.93347	5.94837	5.92207	5.9287	5.95196	5.96242	5.92027	5.94142	5.94783	5.95693	5.89914	5.91203	5.94321	5.9415	5.94103	5.95891	5.93588	5.92622
	Ti	0	0.0025755	0.00440734	0.00273273	0	0	0.00362831	0.00490517	0.000152713	0	0.00257247	0.00694225	0.00136498	0	0.00470819	0.00287565	0.0018074	0.00692939	0.00723589	0.00587758	0.00121079	0.00150766	0.00691245	0.000747527	0.00559952	0	0.00828014	0.00105493	0	0.00770927	0.00287496	0.00724797	0	0.00332609	0	0.0055663	0	0	0.00197024	0.00408901	0.00136436	0.00167528	0	0.000603147	0.00545143	0.00702691	0.00710045	0
	Al	4.079	4.04415	4.08291	4.02808	4.0747	4.10424	4.08236	4.06203	4.09519	4.02701	4.01362	3.98112	4.0072	4.00918	4.03436	4.03476	4.04449	4.04785	4.03879	4.05423	4.05521	4.04487	4.04765	4.01464	4.06322	4.01137	4.01772	4.03525	4.03226	4.05041	4.02185	4.02944	4.04757	4.0138	4.0265	4.01746	4.01989	4.01727	4.02701	3.97304	4.01907	4.04384	4.02808	4.03284	4.01532	3.92986	4.03774	4.01794
	Fe	3.079	3.01752	3.03819	3.03692	2.97957	2.89495	2.78843	2.89695	2.81957	2.72593	2.72853	2.70134	2.62108	2.56877	2.57347	2.58185	2.58454	2.49893	2.499	2.49322	2.47107	2.50459	2.51596	2.51971	2.51793	2.51775	2.50054	2.54274	2.55808	2.5991	2.61271	2.60615	2.65153	2.64667	2.65123	2.67922	2.72354	2.71674	2.73804	2.79463	2.80556	2.79133	2.80448	2.78707	2.85388	2.80039	2.8722	2.88262
	Mn	0.039471	0.0517923	0.0464559	0.0441715	0.0471203	0.0270883	0.0334967	0.0318778	0.0316158	0.0252189	0.0271423	0.0226795	0.0211122	0.0183702	0.0210462	0.0147429	0.014819	0.0186288	0.0178836	0.0158131	0.0146441	0.0217643	0.0165294	0.0203479	0.0116799	0.0209263	0.0193054	0.0205122	0.0272221	0.0207824	0.0262415	0.0264816	0.0254453	0.0263641	0.027171	0.0276857	0.0382718	0.0255347	0.0340051	0.0299466	0.0337986	0.0342634	0.032968	0.0304879	0.0443125	0.0421308	0.0487096	0.0405404
	Mg	2.75463	2.84265	2.78937	2.80224	2.82909	2.92127	2.94387	2.92121	2.99239	3.08169	3.12448	3.16405	3.17742	3.20565	3.23706	3.26018	3.31221	3.32859	3.35447	3.29515	3.34064	3.34743	3.3235	3.28121	3.21548	3.28751	3.27818	3.20765	3.23205	3.22019	3.19033	3.15156	3.15158	3.16884	3.10662	3.06046	3.11737	3.089	3.03527	3.03773	3.09161	3.02546	2.97658	2.99749	2.92702	2.89065	2.87977	2.93771
	Ca	0.238363	0.218983	0.220273	0.219737	0.240753	0.199352	0.235057	0.210634	0.210812	0.224416	0.235445	0.237138	0.2442	0.252687	0.244291	0.235834	0.215822	0.197789	0.196895	0.21934	0.22174	0.23638	0.241914	0.254619	0.260185	0.263011	0.260551	0.267995	0.265485	0.269873	0.26525	0.260424	0.25595	0.273386	0.271307	0.270469	0.250466	0.259963	0.252575	0.256085	0.239426	0.255782	0.257431	0.251487	0.258833	0.257156	0.256736	0.259778
	TOTAL	16.0755	16.0765	16.0679	16.0586	16.0669	16.0474	16.021	16.0458	16.051	16.0354	16.0612	16.0579	16.0337	16.025	16.0465	16.055	16.0748	16.0339	16.0438	16.0253	16.0379	16.0663	16.0609	16.0416	16.0184	16.0474	16.0337	16.0283	16.0495	16.0676	16.0527	16.0297	16.0541	16.0611	16.0348	16.0233	16.0698	16.0499	16.0367	16.0525	16.09	16.0644	16.0427	16.0415	16.0459	15.8861	16.0381	16.0648
	Mg#	0.472198	0.48508	0.478652	0.479905	0.487047	0.502262	0.513558	0.502085	0.514867	0.530629	0.533824	0.539444	0.547973	0.555146	0.557103	0.558057	0.561701	0.571185	0.573073	0.56927	0.574812	0.572012	0.569145	0.565636	0.560832	0.566299	0.567285	0.557815	0.558201	0.553365	0.549769	0.547363	0.543084	0.544895	0.539546	0.533211	0.533713	0.532059	0.525741	0.520841	0.524254	0.520125	0.514885	0.518188	0.506326	0.50793	0.500658	0.504733
	Endmembers
	Py	45.0731	46.3656	45.7702	45.9153	46.4049	48.3441	49.0575	48.1994	49.4251	50.876	51.0903	51.6562	52.3998	53.0256	53.2774	53.5105	54.0558	55.0732	55.279	54.7046	55.2346	54.7846	54.5023	54.0038	53.5442	53.9892	54.1081	53.1165	53.134	52.7041	52.3474	52.1383	51.7967	51.8186	51.2955	50.688	50.8573	50.7122	50.0878	49.6492	50.104	49.5422	49.0258	49.4102	48.1098	48.2553	47.5412	47.9967
	Alm	50.3808	49.2179	49.8531	49.7605	48.8732	47.9085	46.4672	47.7992	46.5707	45.0027	44.6159	44.1021	43.2249	42.4908	42.3556	42.3767	42.1801	41.3461	41.1816	41.3915	40.857	40.9906	41.2594	41.4707	41.9287	41.3478	41.2727	42.106	42.054	42.5388	42.8697	43.1152	43.5785	43.2797	43.7761	44.3739	44.4322	44.6008	45.183	45.6759	45.468	45.7083	46.1912	45.9417	46.9076	46.7485	47.4163	47.0966
	Gro	3.90027	3.57176	3.61442	3.60044	3.94902	3.29908	3.91706	3.47543	3.48197	3.70492	3.84991	3.87151	4.02717	4.17976	4.02067	3.87082	3.52225	3.27252	3.24467	3.64139	3.66627	3.86864	3.96716	4.19066	4.33261	4.31931	4.30054	4.43782	4.36449	4.41694	4.35225	4.30837	4.20659	4.47056	4.47973	4.47956	4.08614	4.26782	4.16799	4.18548	3.88023	4.18845	4.24002	4.14549	4.25429	4.29286	4.23837	4.24429
	Sp	0.645852	0.844768	0.762287	0.723759	0.772903	0.448285	0.558198	0.525979	0.522197	0.416342	0.443821	0.370265	0.348167	0.303866	0.34639	0.24198	0.241848	0.308223	0.294707	0.262522	0.242128	0.356198	0.271067	0.334897	0.194494	0.343662	0.318646	0.339668	0.447524	0.340141	0.430575	0.438102	0.418198	0.43112	0.448638	0.458537	0.624373	0.419203	0.561151	0.489451	0.547755	0.561067	0.543	0.50256	0.728341	0.703313	0.804132	0.662354
	LHR9 Garnet with melt inclusions
	Analysis	45	46	47	48	49	50	51	52	53	54	55	56	57	58	59	60	61	62	63	64	65	66	67	68
	Comment	Line 1 LHR9-C3-L2	Line 2 LHR9-C3-L2	Line 3 LHR9-C3-L2	Line 4 LHR9-C3-L2	Line 5 LHR9-C3-L2	Line 6 LHR9-C3-L2	Line 7 LHR9-C3-L2	Line 8 LHR9-C3-L2	Line 9 LHR9-C3-L2	Line 10 LHR9-C3-L2	Line 11 LHR9-C3-L2	Line 12 LHR9-C3-L2	Line 13 LHR9-C3-L2	Line 14 LHR9-C3-L2	Line 15 LHR9-C3-L2	Line 16 LHR9-C3-L2	Line 17 LHR9-C3-L2	Line 18 LHR9-C3-L2	Line 19 LHR9-C3-L2	Line 20 LHR9-C3-L2	Line 21 LHR9-C3-L2	Line 22 LHR9-C3-L2	Line 23 LHR9-C3-L2	Line 24 LHR9-C3-L2	Line 25 LHR9-C3-L2	Line 26 LHR9-C3-L2	Line 27 LHR9-C3-L2	Line 28 LHR9-C3-L2	Line 29 LHR9-C3-L2	Line 30 LHR9-C3-L2	Line 31 LHR9-C3-L2	Line 32 LHR9-C3-L2	Line 33 LHR9-C3-L2	Line 34 LHR9-C3-L2	Line 35 LHR9-C3-L2	Line 36 LHR9-C3-L2	Line 37 LHR9-C3-L2	Line 38 LHR9-C3-L2	Line 39 LHR9-C3-L2	Line 40 LHR9-C3-L2	Line 41 LHR9-C3-L2	Line 42 LHR9-C3-L2	Line 43 LHR9-C3-L2	Line 44 LHR9-C3-L2	Line 45 LHR9-C3-L2	Line 46 LHR9-C3-L2	Line 47 LHR9-C3-L2	Line 48 LHR9-C3-L2
[wt.%]	SiO2	40.18	40.01	40.39	40.88	40.91	41.05	40.63	40.81	41.1	41.02	40.62	41.01	40.75	40.85	40.84	40.71	40.69	40.87	40.72	40.67	40.85	41.12	40.58	40.44	40.97	41.11	41.11	40.9	40.34	40.86	41.18	41.38	40.52	41	41.25	41.19	41.09	41.14	40.91	40.59	40.94	41.28	41.04	41.19	41.16	40.95	40.6	41.31
	TiO2	0.0391	0.0936	0.0405	0.0503	0.0363	0	0.0448	0.0587	0	0.0322	0.0014	0	0.0684	0	0	0.0028	0.0836	0.0892	0.0753	0.0292	0.0321	0.0544	0.0585	0.1114	0.0947	0.0279	0.0725	0.0014	0.0502	0.0766	0.0223	0	0.0418	0.0446	0.0404	0.0711	0	0.0809	0.0237	0.0167	0.0237	0	0.0125	0.0335	0.039	0.0265	0.0697	0
	Al2O3	23.84	23.52	23.58	23.31	23.4	23.31	23.66	23.63	23.33	23.54	23.4	23.75	23.7	23.76	23.69	23.81	23.75	23.76	23.48	23.76	23.76	23.67	23.68	23.72	23.86	23.6	23.6	23.73	23.75	23.39	23.51	23.95	23.56	23.62	23.76	23.82	23.83	23.63	23.62	23.38	23.53	23.69	23.51	23.63	23.74	23.73	23.59	23.74
	FeO	19.9	19.99	20.19	20.18	20.1	20.13	19.97	20.37	20.4	20.04	20.2	20.33	20.09	20.15	19.99	20.39	20.24	20.14	20.46	20.81	20.57	20.36	20.77	21.12	20.82	20.66	20.32	20.41	20.22	20.26	20.24	20.26	20.33	20.02	20.32	20.61	20.19	20.28	20.32	20.06	20.12	20.34	20.51	20.36	20.45	19.8	20.34	20.12
	MnO	0.202	0.1585	0.1947	0.1641	0.1969	0.1358	0.158	0.2212	0.1635	0.1719	0.2179	0.1796	0.2014	0.1233	0.1887	0.2091	0.1998	0.1502	0.1531	0.1949	0.1986	0.1724	0.2041	0.1275	0.2183	0.2098	0.1907	0.2084	0.2063	0.1899	0.1808	0.156	0.1799	0.2098	0.1921	0.2857	0.185	0.1531	0.1858	0.1886	0.1318	0.168	0.1829	0.18	0.1935	0.2043	0.1482	0.1565
	MgO	15.88	15.66	15.67	15.98	15.6	15.67	15.83	15.87	15.53	15.76	15.97	15.64	15.91	15.68	15.5	15.87	15.77	15.53	15.9	15.67	15.57	15.47	15.33	15.39	15.42	15.1	15.75	15.49	15.68	15.48	15.71	15.66	15.76	15.56	15.72	15.84	15.83	15.87	15.72	15.59	15.87	15.79	16.13	15.99	15.92	16.01	15.76	15.94
	CaO	1.1161	1.2605	1.3551	1.3402	1.3927	1.3972	1.3764	1.46	1.45	1.44	1.3799	1.44	1.3848	1.3651	1.3661	1.3396	1.2748	1.2879	1.3521	1.43	1.43	1.44	1.43	1.46	1.41	1.48	1.46	1.44	1.43	1.47	1.3867	1.43	1.46	1.48	1.46	1.44	1.47	1.43	1.43	1.3831	1.3402	1.2591	1.1654	1.2705	1.3604	1.4	1.41	1.42
	Na2O	0.0341	0	0	0.0075	0	0.0081	0	0.0426	0.0066	0.0098	0.0023	0.0193	0.0043	0.0098	0.0012	0	0	0.0254	0.02	0.0114	0	0.0075	0.0153	0.0044	0.0219	0.0072	0.0156	0.0311	0.0012	0	0	0.0202	0.02	0.03	0	0	0	0.0194	0.0171	0	0.0202	0.0468	0.0106	0	0.0301	0.0193	0	0
	K2O	0.0055	0.0112	0.0111	0.0111	0	0	0.002	0	0.0104	0	0	0	0.0008	0	0.0048	0.0002	0.0094	0	0.014	0.0048	0	0	0	0	0.0077	0	0	0.0099	0	0	0.0084	0.0058	0	0	0	0	0	0	0.0023	0	0	0	0.0018	0	0	0	0	0.003
	P2O5		0.0455		0.0238	0.0835	0.0128	0.039	0.0899	0.0254	0.0576	0.0265	0.0034		0.0293	0.0766	0.0239	0.0381	0.0143	0.0284		0.0106		0.0151	0.0162	0.0583	0.0445		0.0149	0.0606	0.0031			0.0771	0.0303		0.097	0.0156	0.0487		0.0843	0.0513	0.0366	0.0286	0.008		0.0536	0.0108	0.0545
	Cl	0	0.0147	0	0	0	0.0055	0.0294	0.0006	0.0153	0.0165	0	0.0012	0.011	0.0177	0.0086	0.022	0	0	0.0067	0.0073	0	0	0.0165	0.0104	0	0	0	0	0	0	0.019	0	0	0	0	0	0	0	0.0067	0.0085	0	0	0.0135	0.0128	0	0	0.0073	0
	Cr2O3	0.019	0.1417	0.0883	0.0447	0.0525	0.0233	0.0638	0	0.0248	0.0074	0.0434	0.0031	0	0.0499	0	0.0986	0.0203	0.0188	0.0002	0	0	0	0.01	0	0.0787	0.0458	0.0227	0.0413	0.0518	0.0738	0.0093	0.0175	0.0204	0.0034	0.0452	0.0005	0.041	0.093	0.0212	0	0.0412	0.0569	0.0077	0.0774	0.0431	0.0134	0	0.0269
	Total	101.216	100.906	101.52	101.992	101.772	101.743	101.803	102.553	102.056	102.095	101.861	102.376	102.121	102.035	101.666	102.476	102.076	101.886	102.21	102.588	102.421	102.294	102.109	102.4	102.96	102.285	102.541	102.277	101.79	101.803	102.266	102.879	101.969	101.998	102.788	103.354	102.652	102.745	102.267	101.301	102.068	102.667	102.613	102.752	102.936	102.207	101.936	102.771
[a.p.f.u.]	Si	5.8713	5.88078	5.89689	5.93488	5.95188	5.96687	5.9077	5.90294	5.96574	5.94342	5.90945	5.92862	5.90328	5.92409	5.9402	5.89161	5.90211	5.93121	5.90678	5.8855	5.91091	5.94718	5.90129	5.87311	5.91076	5.96045	5.93484	5.92648	5.87725	5.94552	5.95598	5.94508	5.89515	5.94482	5.93823	5.91146	5.9222	5.93178	5.92447	5.93304	5.93543	5.95108	5.92424	5.93449	5.92229	5.92098	5.90025	5.94289
	Ti	0.00429727	0.0103475	0.0044473	0.00549238	0.00397213	0	0.00489939	0.00638604	0	0.00350904	0.000153189	0	0.0074527	0	0	0.000304778	0.00912048	0.00973633	0.00821542	0.00317822	0.00349349	0.00591764	0.00639857	0.0121684	0.0102759	0.00304248	0.00787212	0.000152579	0.0055009	0.00838324	0.00242585	0	0.00457398	0.00486387	0.00437428	0.00767475	0	0.00877327	0.00258143	0.00183597	0.00258431	0	0.00135715	0.00363018	0.00422057	0.00288403	0.00761849	0
	Al	4.10545	4.07412	4.05717	3.98817	4.01209	3.99306	4.05431	4.02806	3.99087	4.01955	4.01193	4.0463	4.04617	4.06075	4.06079	4.0609	4.05988	4.06364	4.01394	4.05215	4.05172	4.03447	4.05832	4.05978	4.05675	4.03249	4.01517	4.0523	4.07786	4.01099	4.00728	4.05511	4.03953	4.03613	4.03097	4.02879	4.04763	4.01527	4.03116	4.02747	4.02028	4.02487	3.99952	4.01222	4.02555	4.0466	4.0402	4.02488
	Fe	2.43153	2.45687	2.46484	2.44977	2.44525	2.4467	2.42802	2.46375	2.47603	2.42796	2.45732	2.45756	2.4336	2.44347	2.43126	2.46748	2.4549	2.444	2.48171	2.51817	2.48886	2.46229	2.52566	2.56481	2.51166	2.50475	2.45295	2.47298	2.46333	2.4651	2.44783	2.43394	2.47324	2.42729	2.44602	2.47334	2.43325	2.44507	2.46063	2.45184	2.43913	2.45194	2.47568	2.45286	2.46043	2.39569	2.47172	2.42032
	Mn	0.0249985	0.0197303	0.0240743	0.0201766	0.024261	0.0167175	0.0194566	0.0270973	0.0200992	0.0210938	0.0268474	0.0219892	0.0247095	0.0151437	0.0232448	0.0256287	0.0245445	0.0184607	0.0188086	0.0238869	0.0243378	0.0211171	0.0251372	0.0156822	0.0266729	0.0257618	0.0233158	0.0255747	0.0254552	0.0234021	0.0221465	0.0189815	0.0221664	0.0257632	0.0234207	0.0347257	0.0225817	0.0186954	0.0227879	0.0233474	0.016183	0.0205118	0.0223603	0.0219635	0.0235795	0.0250363	0.0182403	0.0190676
	Mg	3.45939	3.43149	3.4107	3.45862	3.38356	3.39568	3.43145	3.42218	3.36061	3.40425	3.46367	3.37074	3.43606	3.39	3.36103	3.42401	3.41017	3.35996	3.43847	3.38067	3.35874	3.33559	3.32355	3.33212	3.31655	3.26387	3.38975	3.34619	3.40572	3.35805	3.38741	3.35416	3.41827	3.36348	3.37373	3.38909	3.40136	3.41132	3.39389	3.39726	3.43009	3.39362	3.47124	3.43451	3.41494	3.45365	3.41449	3.41866
	Ca	0.174723	0.198486	0.211954	0.208445	0.217072	0.217577	0.214407	0.226244	0.225482	0.223524	0.215068	0.223022	0.214919	0.212088	0.212873	0.207697	0.1981	0.200236	0.210123	0.221701	0.221677	0.223122	0.222789	0.22716	0.217931	0.229887	0.225807	0.223542	0.223201	0.229156	0.214868	0.220102	0.227562	0.2299	0.225169	0.221405	0.226979	0.220891	0.221859	0.216588	0.208159	0.194464	0.180228	0.196105	0.209702	0.217026	0.219526	0.218853
	TOTAL	16.0717	16.0718	16.0701	16.0655	16.0381	16.0366	16.0602	16.0766	16.0388	16.0433	16.0844	16.0482	16.0662	16.0455	16.0294	16.0776	16.0588	16.0272	16.078	16.0852	16.0597	16.0297	16.0631	16.0848	16.0506	16.0203	16.0497	16.0472	16.0783	16.0406	16.0379	16.0274	16.0805	16.0323	16.0419	16.0665	16.054	16.0518	16.0574	16.0514	16.0519	16.0365	16.0746	16.0558	16.0607	16.0619	16.072	16.0447
	Mg#	0.587241	0.582758	0.580491	0.585374	0.580489	0.581216	0.585624	0.581418	0.575779	0.583698	0.584982	0.57834	0.585394	0.581129	0.580259	0.581179	0.581438	0.578909	0.580804	0.573108	0.574379	0.575312	0.568205	0.565061	0.569051	0.565797	0.580168	0.575029	0.580285	0.576673	0.58051	0.579492	0.580203	0.580835	0.579704	0.578103	0.582963	0.582495	0.579704	0.580818	0.58442	0.580546	0.583704	0.583369	0.581229	0.590434	0.580083	0.585489
	Endmembers
	Py	56.7984	56.1934	55.8073	56.3567	55.741	55.8806	56.3148	55.7425	55.253	56.0202	56.2019	55.5009	56.2432	55.9341	55.7532	55.9039	56.0173	55.7887	55.9181	55.0201	55.119	55.2057	54.51	54.2711	54.6131	54.1787	55.6442	55.1423	55.6699	55.2701	55.7851	55.6505	55.6609	55.6275	55.5956	55.3903	55.9051	55.9602	55.6451	55.7931	56.2904	55.9954	56.4475	56.2533	55.9033	56.6971	55.7561	56.2566
	Alm	39.9224	40.2332	40.3307	39.918	40.2833	40.2637	39.8472	40.1309	40.7093	39.9544	39.8727	40.4649	39.8344	40.3166	40.3301	40.2866	40.3254	40.5801	40.3589	40.9829	40.8437	40.7521	41.4237	41.7736	41.3591	41.5777	40.2663	40.7525	40.2656	40.573	40.3117	40.3827	40.2726	40.1442	40.3079	40.4236	39.9931	40.1096	40.3438	40.2665	40.028	40.4575	40.2582	40.175	40.2778	39.329	40.3613	39.8283
	Gro	2.8687	3.25037	3.46809	3.39653	3.57606	3.58053	3.51871	3.68519	3.70723	3.67831	3.48972	3.67217	3.51791	3.49939	3.53116	3.39107	3.25409	3.32471	3.41713	3.60816	3.63786	3.69278	3.65399	3.69982	3.58863	3.81602	3.70672	3.68377	3.64844	3.77167	3.53852	3.65183	3.70548	3.80223	3.71055	3.61858	3.73065	3.62356	3.63754	3.55701	3.41605	3.20869	2.93077	3.21197	3.43288	3.56283	3.5847	3.60139
	Sp	0.410441	0.3231	0.393914	0.328769	0.399678	0.27511	0.31931	0.441376	0.330458	0.347119	0.43563	0.362062	0.404458	0.249866	0.385588	0.41844	0.403181	0.30652	0.305875	0.388757	0.399398	0.349498	0.412279	0.25542	0.439218	0.427633	0.38274	0.421449	0.41609	0.385175	0.364716	0.314931	0.360944	0.426088	0.385948	0.567548	0.371156	0.306684	0.373623	0.383433	0.265575	0.338449	0.363611	0.359738	0.386002	0.41101	0.297851	0.313771
	Composition of sapphirine
	Analysis	LHR9-C1-1	LHR9-C1-2	LHR9-C1-3	LHR9-C3-105		LHR8-C1-2	LHR8-C1-3	LHR8-C1-1	LHR8-C1-4	LHR8-C1-5	LHR8-C1-7		LHR8-C3-1	LHR8-C3-3	LHR8-C3-4	LHR8-C3-5	LHR8-C3-2	LHR8-C3-6	LHR8-C3-7
	Comment	Sa+Qz in Ni	Sa+Qz in Ni	Sa+Qz in Ni	Sa+Qz in Ni		Sa	Sa	Sa	Sa	Sa	Sa		Sa + qz in Grt	Sa + qz in Grt	Sa + qz in Grt	Sa + qz in Grt	Sa + qz in Grt	Sa + qz in Grt	Sa + qz in Grt
[wt.%]
	SiO2	12.68	12.9	12.64	12.42		13.25	13.37	12.64	13.13	13.04	13.14		12.96	12.59	12.87	12.55	12.84	12.74	12.56
	TiO2	0.5775	0.3339	0.3627	0.232		0.0748	0.0853	0.0718	0.0359	0.0523	0.0882		0.0615	0	0.0706	0.0376	0.0222	0.0675	0
	Al2O3	63.74	63.63	63.95	64.96		61.79	61.74	62.68	61.9	61.78	61.81		63.77	64.32	63.51	63.96	63.32	64.32	64.38
	Cr2O3	0.0975	0.2291	0.1312	0.121		0.532	0.4976	0.6648	0.5721	0.5699	0.6461		0.1291	0.004	0.0326	0.1029	0.1244	0.1697	0.0734
	FeO	6.04	6.15	5.99	5.61		8.35	8.48	8.02	8.3	8.37	8.12		6.87	5.75	6.57	6.24	6.84	6.76	6.36
	MnO	0.0262	0.0232	0.0644	0.011		0	0.003	0.0374	0.0104	0.0844	0.05		0.006	0.0097	0	0	0.0479	0	0.0359
	MgO	17.05	17.17	16.94	17.43		16.32	16.23	16.22	16.18	16.29	16.29		17.06	17.36	16.7	16.7	17.06	16.77	16.97
	CaO	0.0157	0.0376	0.0196	0.048		0.0248	0.0409	0.0198	0.0402	0.0188	0.0166		0.0267	0	0.0187	0.0104	0	0.0335	0.0062
	Na2O	0.158	0.0178	0.0017	0		0	0.036	0	0.0043	0.0279	0		0.0364	0.0215	0	0.0101	0.0139	0	0
	K2O	0.0135	0.037	0.0235	0.033		0.0098	0.0189	0.0044	0	0.0194	0.007		0.012	0.007	0	0.132	0	0	0
	Totale	100.398	100.529	100.123	100.865		100.351	100.502	100.358	100.173	100.253	100.168		100.932	100.062	99.7719	99.743	100.268	100.861	100.386
[a.p.f.u]	Si	1.48995	1.51502	1.49009	1.44865		1.57334	1.58601	1.49918	1.56197	1.54979	1.56284		1.51752	1.47936	1.52423	1.48452	1.5131	1.49355	1.4758
	Ti	0.051051	0.0295016	0.0321672	0.0203578		0.00668202	0.00761242	0.00640663	0.00321294	0.00467623	0.007892		0.00541759	0	0.0062904	0.00334604	0.00196814	0.00595326	0
	Al	8.82715	8.8074	8.88509	8.92987		8.6473	8.6317	8.76174	8.67869	8.65363	8.6643		8.80042	8.90739	8.86485	8.91678	8.79427	8.88696	8.91551
	Cr	0.009058	0.0212731	0.0122285	0.0111585		0.0499451	0.0466691	0.0623407	0.053809	0.0535511	0.0607566		0.0119518	0.000371607	0.00305257	0.00962353	0.0115904	0.0157293	0.00681884
	Fe3+	0.119813	0.0918756	0.0620906	0.125857		0.1442	0.145535	0.16542	0.138133	0.193261	0.134549		0.151805	0.139462	0.0710488	0.120089	0.167175	0.0983017	0.126062
	Fe2+	0.473721	0.512158	0.528448	0.421363		0.68498	0.695715	0.630072	0.687603	0.638648	0.673114		0.520929	0.425569	0.579672	0.497194	0.506911	0.564454	0.498898
	Mn	0.00260759	0.00230783	0.00643038	0.00108673		0	0.000301426	0.00375719	0.00104792	0.00849616	0.00503703		0.000595069	0.000965397	0	0	0.00478106	0	0.00357289
	Mg	2.98666	3.00613	2.97706	3.03074		2.88892	2.87012	2.86791	2.86942	2.88618	2.88834		2.97796	3.04093	2.94848	2.94489	2.99703	2.93084	2.97255
	Ca	0.00197656	0.00473124	0.00247559	0.00599849		0.00315512	0.00519822	0.0025161	0.00512379	0.00239392	0.00211536		0.00334965	0	0.00237286	0.00131806	0	0.00420778	0.000780528
	Na	0.0359961	0.00405318	0.000388562	0		0	0.00827985	0	0.000991796	0.00642902	0		0.00826378	0.00489816	0	0.00231639	0.00317588	0	0
	K	0.00202369	0.00554357	0.0035342	0.00491039		0.00148454	0.00286018	0.000665758	0	0.0029414	0.00106212		0.00179255	0.00104931	0	0.0199194	0	0	0
	Totale	14	14	14	14		14	14	14	14	14	14		14	14	14	14	14	14	14
	Fe2O3	1.35501	1.03959	0.699928	1.43392		1.6138	1.63037	1.85342	1.54306	2.16094	1.50334		1.72286	1.57725	0.797217	1.34913	1.88522	1.1143	1.42573
	FeO	4.82074	5.21456	5.3602	4.31974		6.89788	7.01297	6.35227	6.91154	6.42556	6.76728		5.31976	4.33077	5.85266	5.02604	5.14366	5.75734	5.07711
	Totale	100.534	100.633	100.193	101.009		100.513	100.665	100.544	100.327	100.469	100.319		101.104	100.22	99.8518	99.8782	100.457	100.972	100.528
	Fe3+/Fetot	20.1864	15.2104	10.5142	22.9993		17.3906	17.2999	20.7946	16.7285	23.231	16.6591		22.5654	24.6822	10.9185	19.4545	24.8003	14.8323	20.1712
	XFe3+	0.201864	0.152104	0.105142	0.229993		0.173906	0.172999	0.207946	0.167285	0.23231	0.166591		0.225654	0.246822	0.109185	0.194545	0.248003	0.148323	0.201712
	Table S1: Major element composition of garnet and sapphirine. Fe2O3 for sapphirine was calculated using the method of Droop (1987).
[truncated: 12 more columns]

## Sheet: G51097
Carvalho, B.B., et al., 2023, Revealing the link between A-type granites and hottest melts from residual metasedimentary crust: Geology, https://doi.org/10.1130/G51097.1
